# Supplementary material
Source: Springer Nature journal article supplement (https://www.springermedizin.de/resource/supplementary/12885_2010_2312_MOESM2_ESM.pdf/9460996)

## Chr 13: Exon 14

intronic  
region\* \* \*  
AAAAACAGGTGACCGGCTCCTCAGATAATGAGTACTTCTACGTTGATTTCAGAGAATATGAATATGATCTCAAATGGGAGTTTCCAAGAGAAAATTTAGAGTTTGGTAAGA

0004

0087

0104

0126

0261

0678

0999

1073

1148

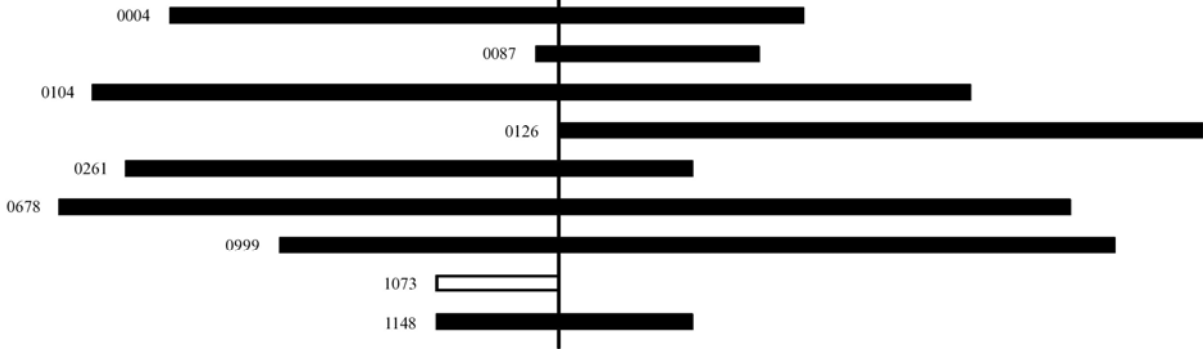

Supplement: MOESM2 [file 9460996]
